# Supplementary figures and images for: A motogenic GABAergic system of mononuclear phagocytes facilitates dissemination of coccidian parasites
Source: eLife journal article supplement (doi:10.7554/elife.60528), 2020-11-12

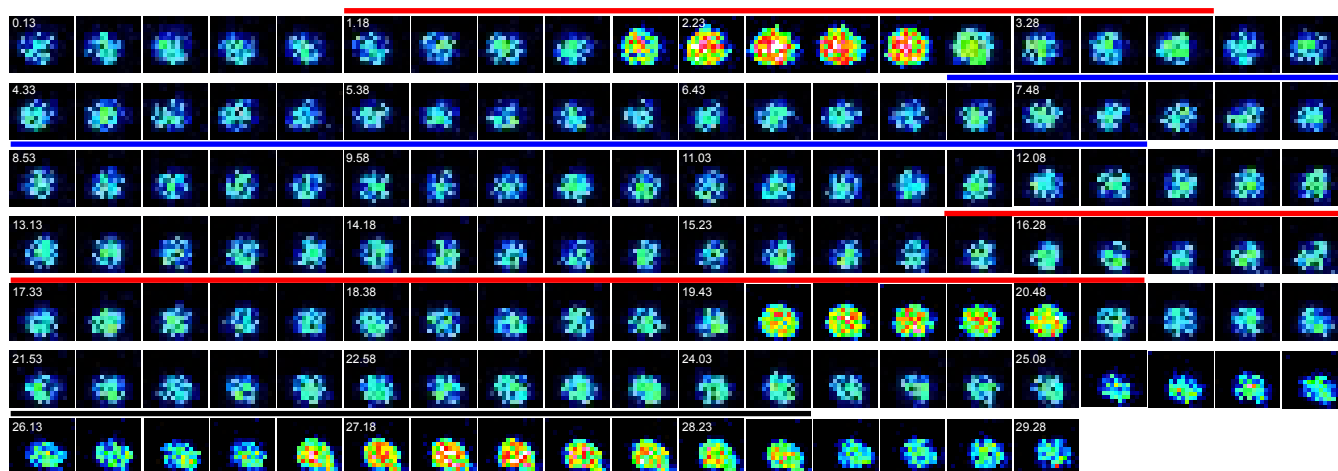

high low

— Bay K — Bay K+ CPCPT — ATP

Supplement: supp [file elife-60528-supp-v1.zip]

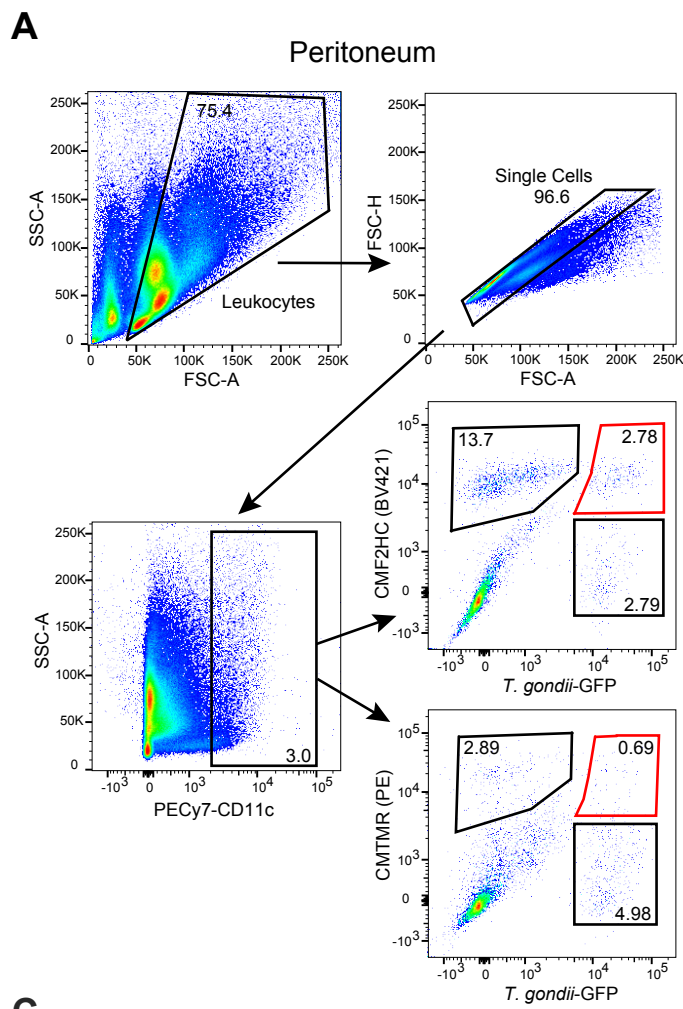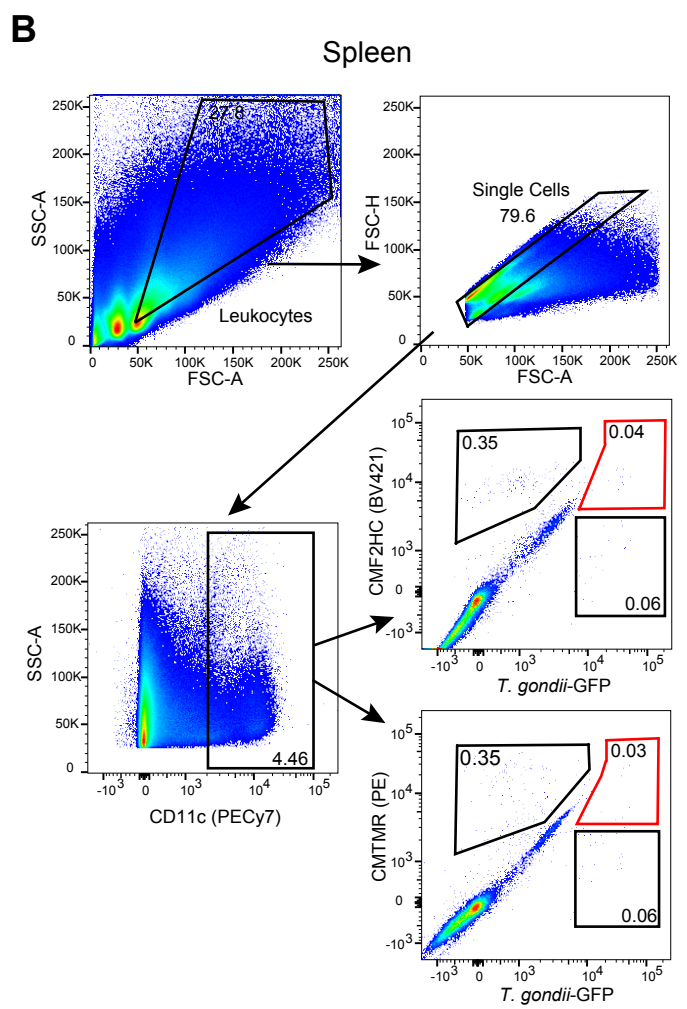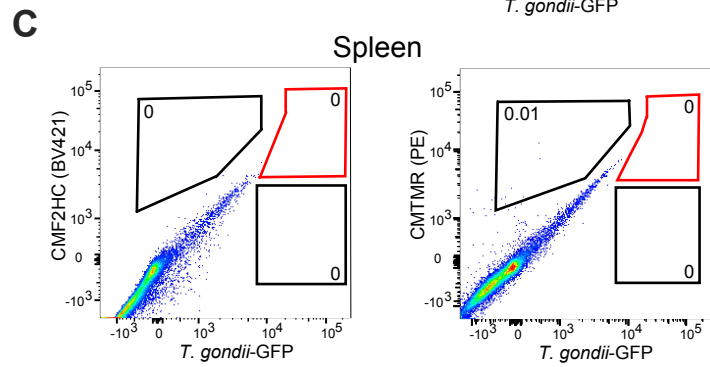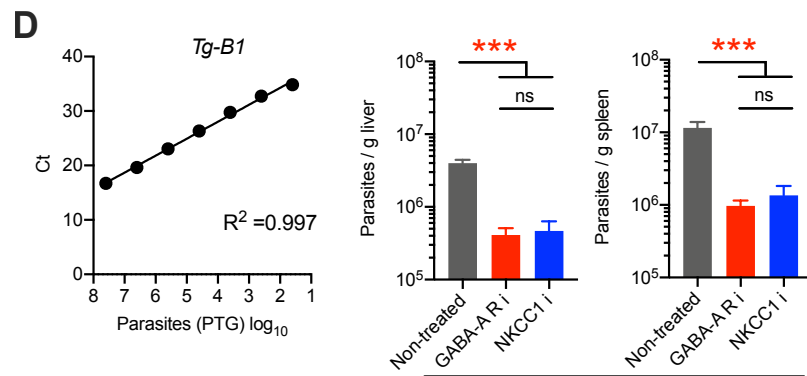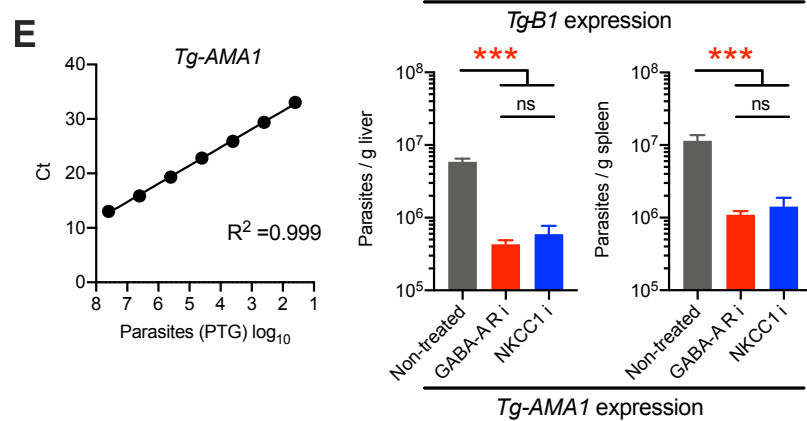

Supplement: supp [file elife-60528-supp-v1.zip]

Mock

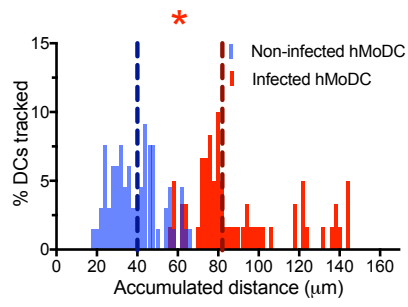

ShLuc

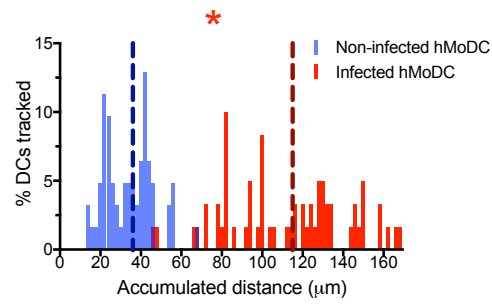

Infected ShGAD67 hMoDC

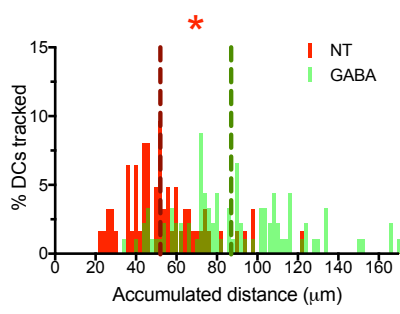

Infected ShNKCC1 hMoDC

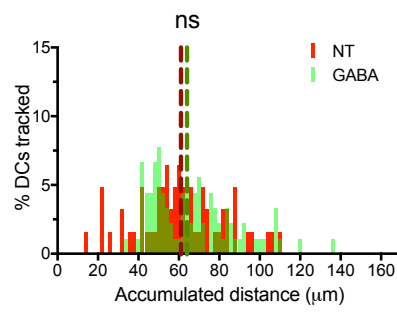

Supplement: supp [file elife-60528-supp-v1.zip]

**A**

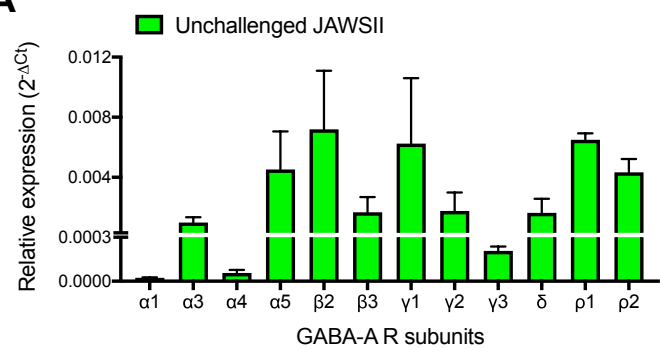

**B**

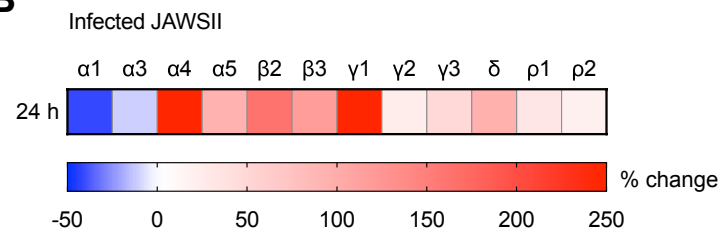

Supplement: supp [file elife-60528-supp-v1.zip]

**A**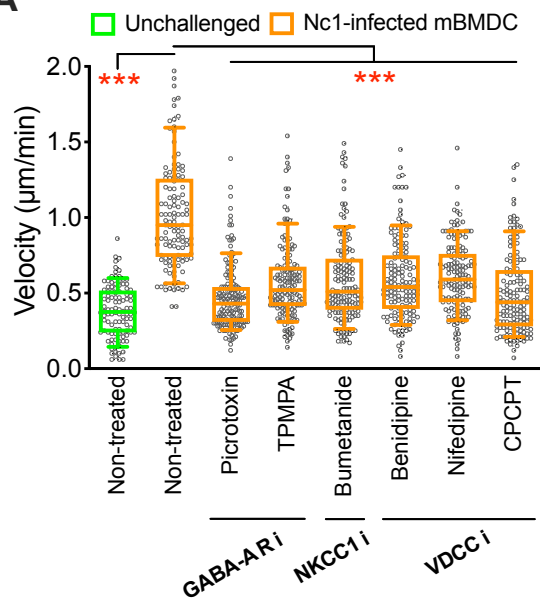**B**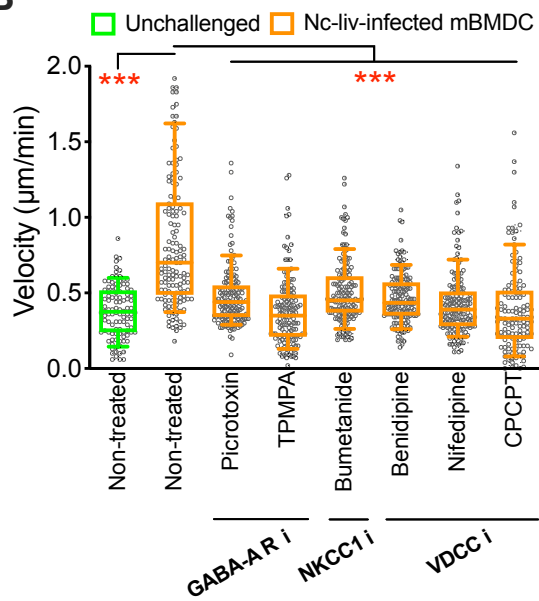**C**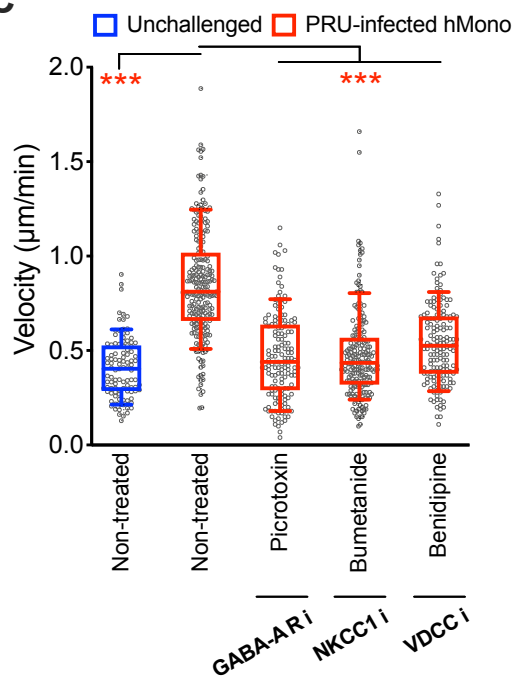

Supplement: supp [file elife-60528-supp-v1.zip]

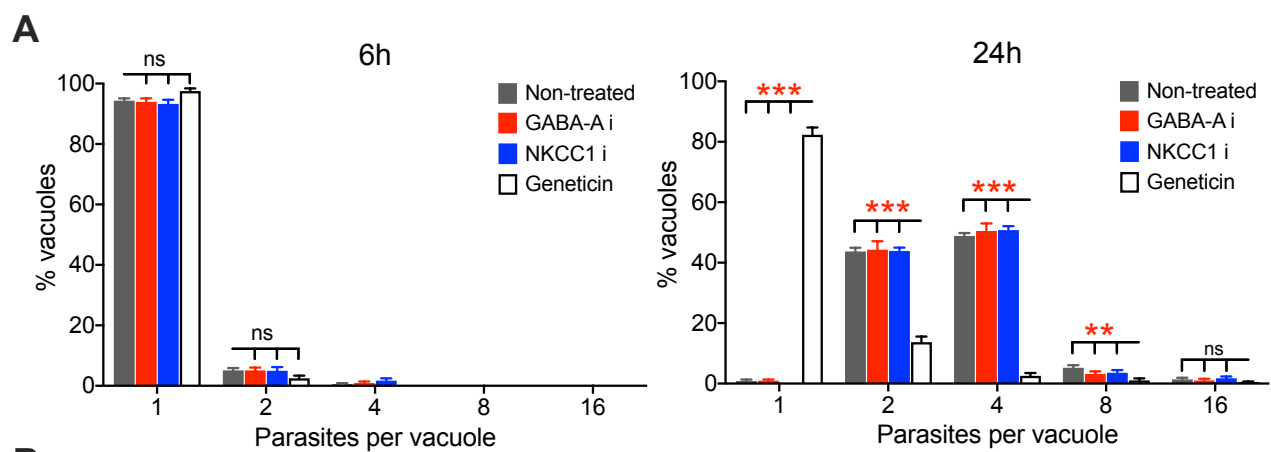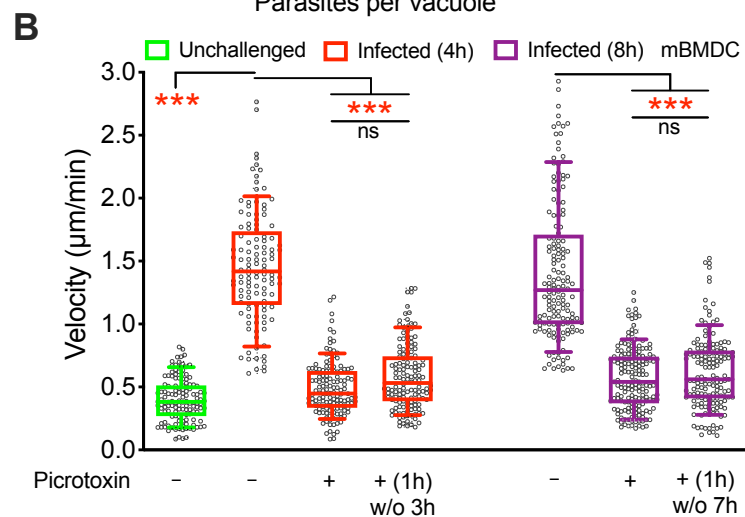

Supplement: supp [file elife-60528-supp-v1.zip]

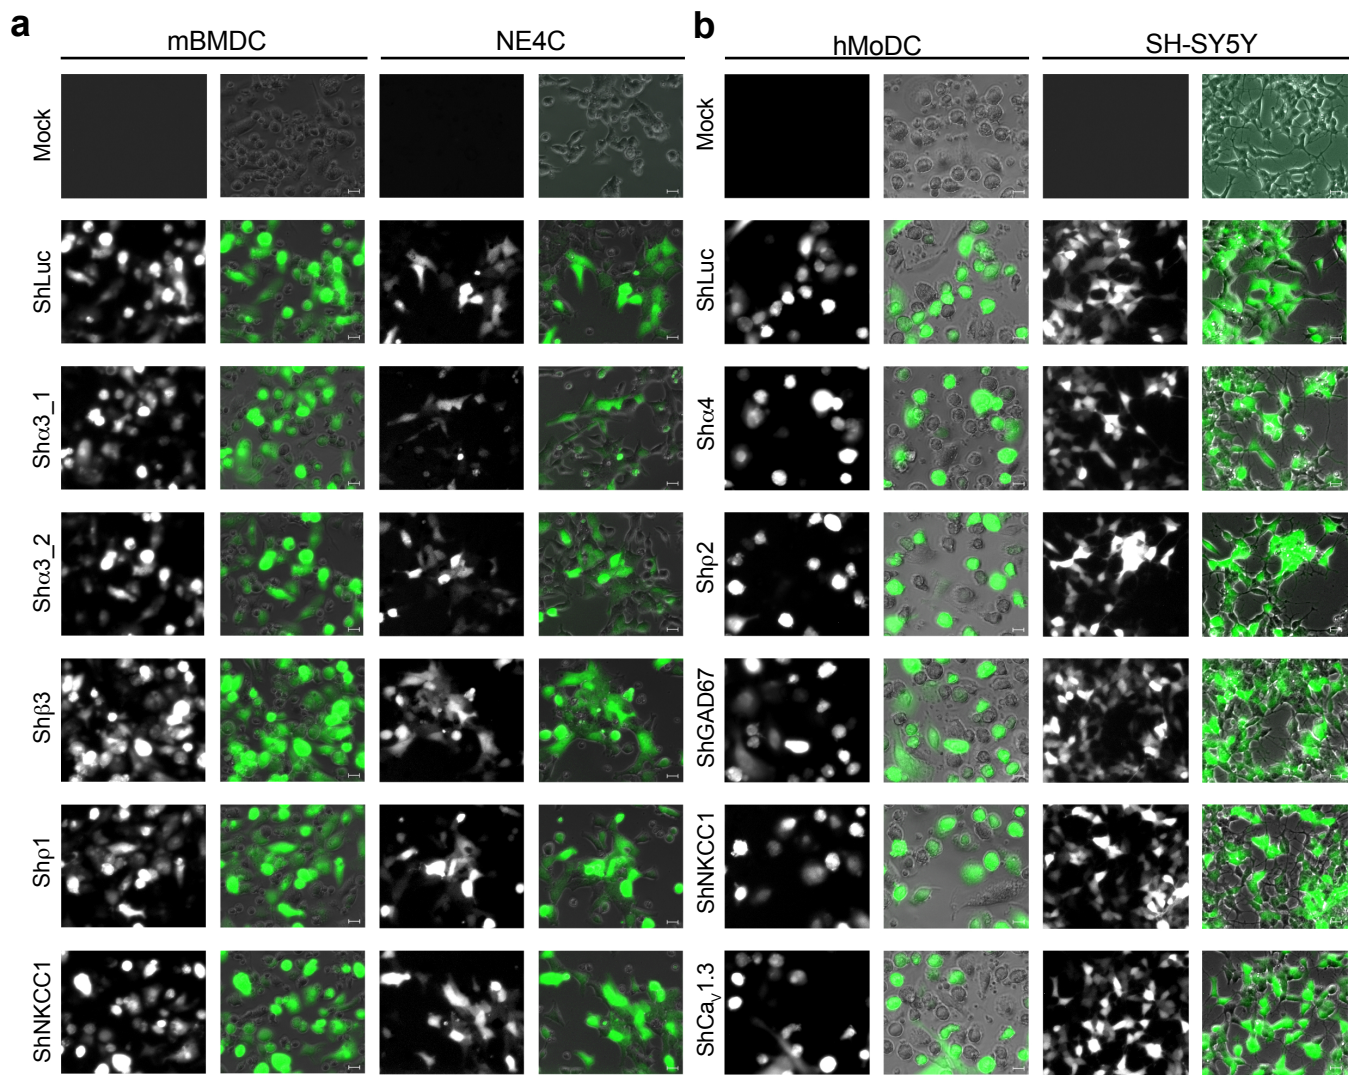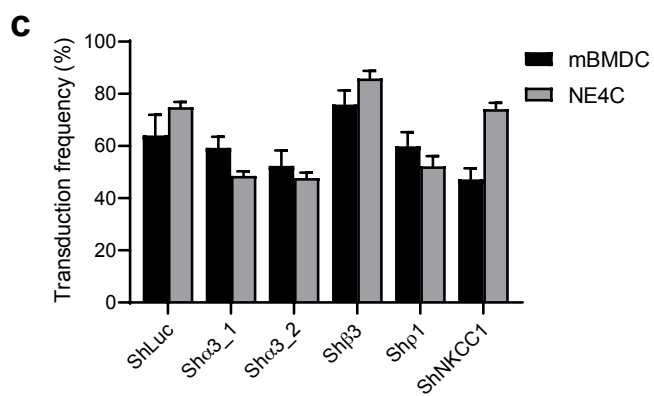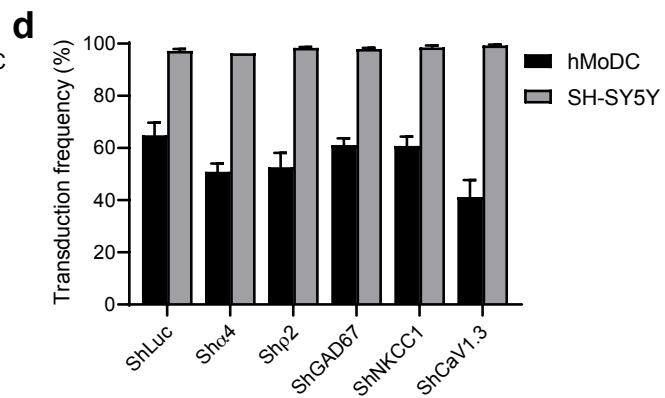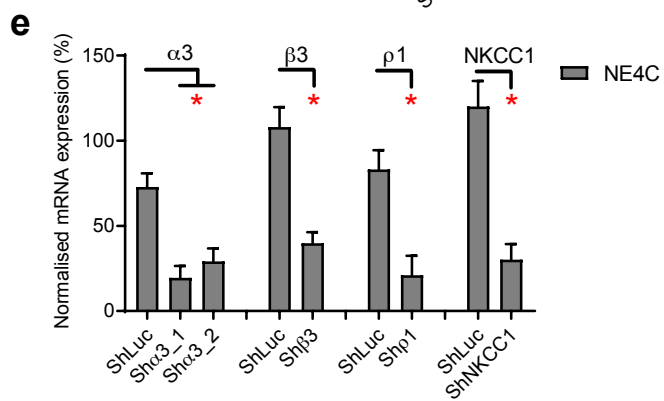

Supplement: supp [file elife-60528-supp-v1.zip]

**A**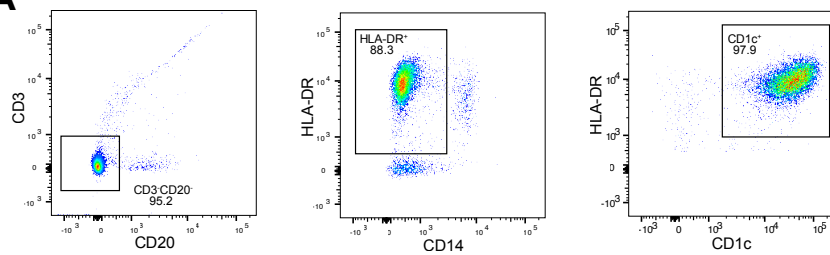**B**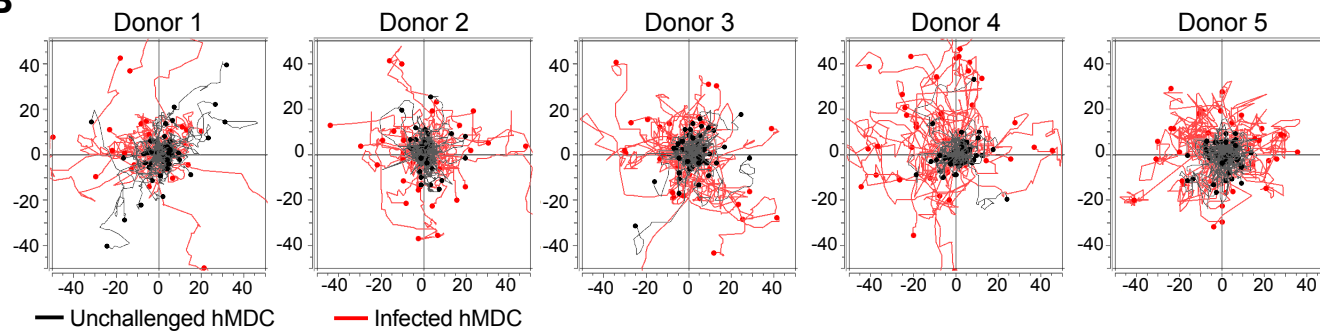**C**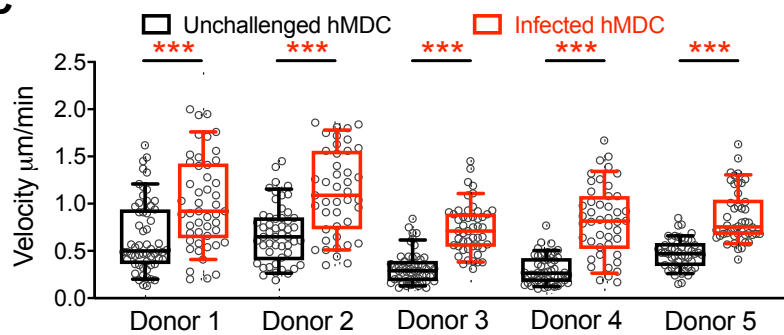**D**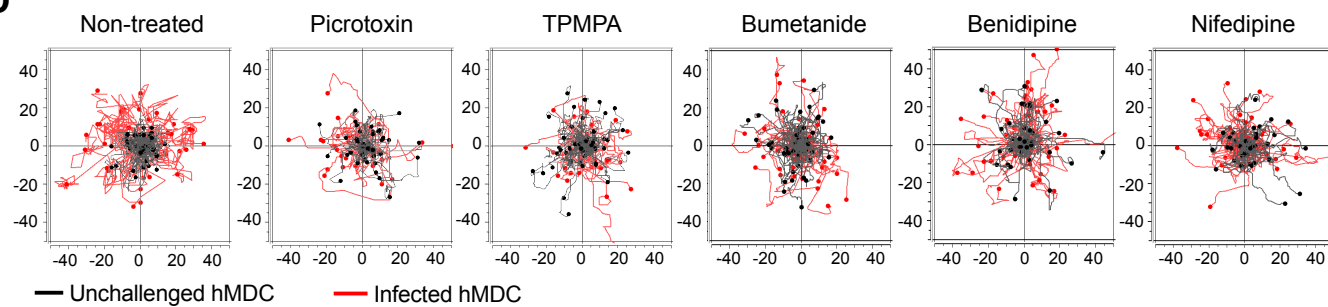**E**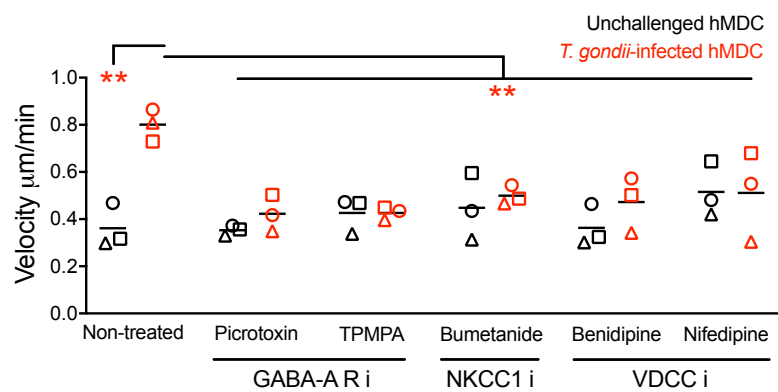

Supplement: supp [file elife-60528-supp-v1.zip]
